# Supplementary material for: Size- and shape-controlled synthesis of ZnIn2S4 nanocrystals with high photocatalytic performance
Source: Royal Society of Chemistry journal article supplement (doi:10.1039/c2ce26593a), 2013-01-01
Supplement: c2ce26593a.pdf [file c2ce26593a.pdf]

## Supporting information

### Size and Shape Controlled Synthesis of ZnIn<sub>2</sub>S<sub>4</sub> Nanocrystals with Enhanced Photocatalytic Performance

Shengjie Peng,<sup>\*a,b</sup> Linlin Li,<sup>a,c</sup> Yongzhi Wu,<sup>d,e</sup> Lin Jia,<sup>d,f</sup> LingLing Tian,<sup>d,f</sup> Madhavi Srinivasan,<sup>a,c</sup> Seeram Ramakrishna,<sup>d</sup> Qingyu Yan<sup>\*a,c</sup> and Subodh G. Mhaisalkar<sup>a,b</sup>

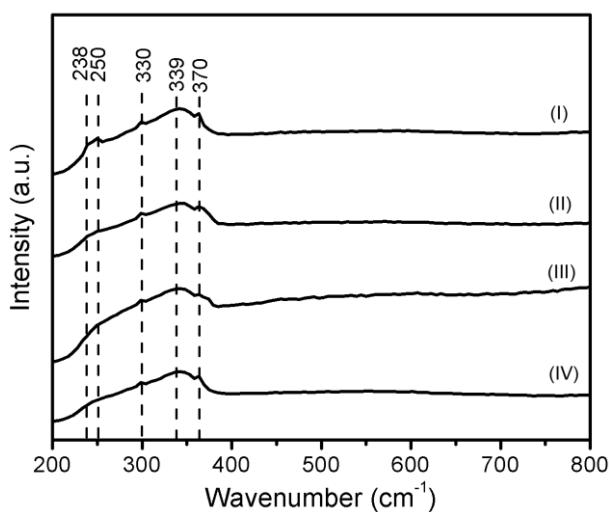

Fig. S1 Raman spectra of the ZnIn<sub>2</sub>S<sub>4</sub> samples with different sizes: 210 °C (I), 180 °C (II), 160 °C (III), 140 °C (IV).

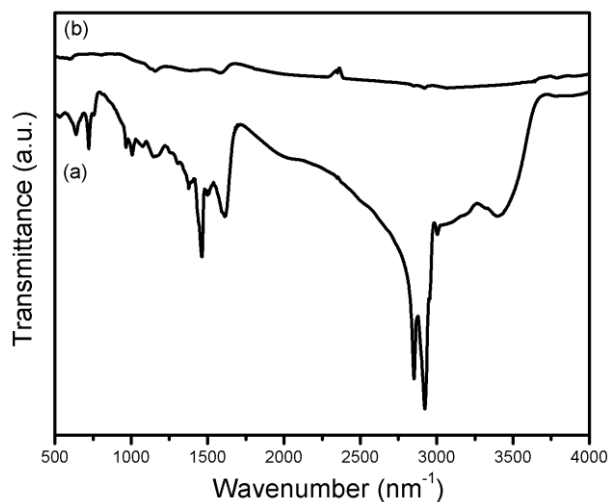

Fig. S2 IR spectra of the 9.1-nm-sized ZnIn<sub>2</sub>S<sub>4</sub> nanocrystals before (a) and after annealing treatment.

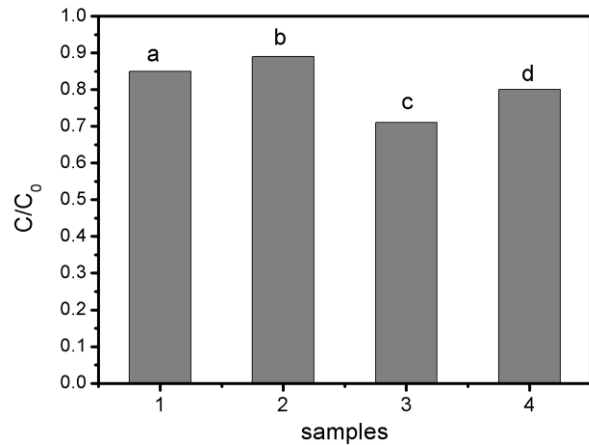

Fig. S3 Bar plots showing the remaining MO dye in solutions after reaching the adsorption–desorption equilibrium in the dark for 30 min with stirring in the presence of unannealed  $\text{ZnIn}_2\text{S}_4$  nanocrystals (a), unannealed  $\text{ZnIn}_2\text{S}_4$  nanoplates (b), annealed  $\text{ZnIn}_2\text{S}_4$  nanocrystals (c), and annealed  $\text{ZnIn}_2\text{S}_4$  nanoplates (d).

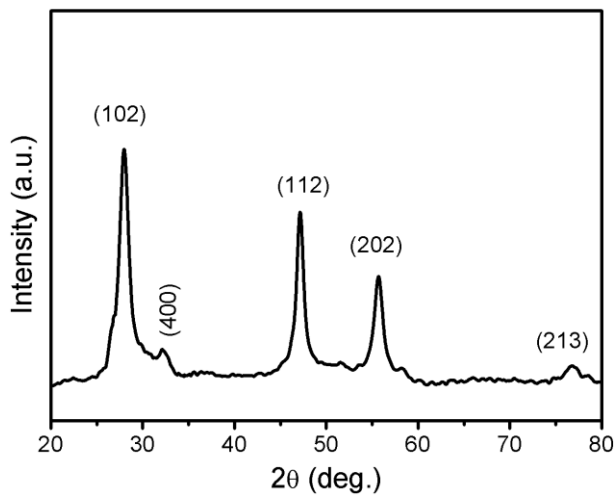

Fig. S4 XRD pattern of the  $\text{ZnIn}_2\text{S}_4$  photocatalyst after degradation process.
